# Supplementary material for: Evidence for low prevalence of ranaviruses in Ontario, Canada’s freshwater turtle population
Source: PeerJ. 2019 May 20;7:e6987. doi: 10.7717/peerj.6987 (PMC6532614; doi:10.7717/peerj.6987)
Supplement: File S1 [file peerj-07-6987-s001.xlsx]

## Sheet: Sheet1
Liver/Kidney samples tested
ID number	species	sex	location found
16-249	Painted	F	Highway 62S and Lake of Bay Rd	Dunsford
18-666	Painted	F	36 and Settlers Rd Dunsford
14-243	Snapping	F	Highway 11 N at Bayou Rd Cumbeland Beach
14-192	Blanding's	F	County Rd 46 near 169, Kawartha Lakes
18-693	Painted	M	Beach Rd and Elmtree Rd Little Britain
16-143	Painted	M	Highway 7A and Porter Rd Bethany
18-663	Snapping	F	507 and Aecon Fire Access Rd Trent Lakes
18-702	Snapping	M	15 and Ford Rd Smiths Falls
18-650	Painted	M	TV rd and Park Rd Otoabee S Monaghan
18-665	Painted	M	Highway 35 Kawartha Lakes
18-682	Painted	F	Near Grand River Trail, Kitchener
18-757	Snapping	M	Trafalger Rd and Wellington Rd, Erin
18-747	Snapping	F	4738 Highway 28 Lovesick Lake Trailer Pl Lakefield
18-658	Blanding's	F	Fitzgerald Lane and Kirkfield Rd, Kirkfield
18-100	Painted	F	Keswick Lake Dr
18-107	Painted	M	5127 Trafalgar Rd Erin
18-680	Snapping	M	64210 Dufferin County Rd 3, Garafaxa
18-728	Snapping	M	285 Lakeshore Rd, Huntsville
18-687	Painted	M	26583 Highway 62, L'Amable
18-807	Snapping	Juvenile	County Rd 46, Havelock
18-624	Snapping	M	Ravenshoe/Conc3, Keswick
18-657	Snapping	M	12375 Simcoe St, Port Perry
18-689	Painted	F	Lakeshore between 13 and 14, Oro-Medonte
18-379	Painted	M	1km north of Northeys Bay Rd, North Kawartha
18-750	Painted	M	1km E of Maple Rd on 17. Innisfil
15-407	Painted	M	2200 Concession 2, Stouffville
18-547	Painted	M	Richmond Rd and Cuckoos nest rd, Frankford
17-278	Painted	M	Keene Rd. Peterborough
18-749	Painted	F	2 blocks we3st of 28 on 15th Line, Selwyn
14-284	Map	F	Lagoon Rd and Bisnett Line, Chatham-Kent
16-046	Painted	F	Television Rd and Keene Rd, Peterborough
14-241	Painted	F	Television Rd and Landsdowne, Peterborough
14-045	Blanding's	M	Kaladar near Kellar Rd
16-282	Snapping	M	Tornline Rd and Concession Rd 10, Raglan
14-248	Painted	F	4082A Calabogie Rd, Calabogie
14-132	Snapping	M	396 Belmont 3rd Line, Havelock
16-045	Snapping	M	Sutton Rd and Wellemkom Lake Rd, Gilmour
16-053	Painted	F	Round Lake Rd and South at Tresmore, Round Lake
16-229	Painted	F	Aspdin Rd, Rosseau
14-213	Painted	F	County Rd 4 near Rotten Lake, Norwood
17-278	Painted	M	Keene Rd. Peterborough
17-640	Painted	F	Homestead Rd east of Park Rd, Beaverton
18-616	Snapping	Juvenile	Ashburnham Dr and Neal Dr, Peterborough
18-543	Painted	F	Highway 35 and Landside Rd, Lindsay
18-599	Snapping	M	Pigeon Lake Rd and Cork Rd, Lindsay
18-669	Blanding's	F	Highway 69, one mile North of Dumont rd, Shawanaga
14-206	Painted	F	118 between Haliburton and Wilberforce, Haliburton
18-620	Painted	F	48 S of Aurora, Ballantrae
16-089	Painted	F	Highway 7 and 50, Havelock
18-599	Snapping	M	Pigeon Lake Rd and Cork Rd, Lindsay
18-493	Snapping	F	Finnerty sideroad just east of 50, Palgrave
18-700	Snapping	Juvenile	70 Olde Bayview Ave, Richmond Hill
Live Turtles Tested
18-2030	Snapping	M	8844 8th Concession Rd, Cottam
17-017	Wood	Juvenile
17-019	Snapping	M	336 Eagle Street, Cambridge
18-013	Painted	F	Mill Pond, Dorchester
18-006	Wood	Juvenile
18-713	Snapping	M	1901 Northshore Rd, North Bay
18-700	Snapping	Juvenile	70 Olde Bayview Ave, Richmond Hill
17-800	Painted	F	Lucky Strike Rd, Trent River Rd
17-573	Wood	M
18-852	Snapping	M	602827 McCullough Rd, Chatsworth
